# Supplementary material for: Antibodies Specific to Membrane Proteins Are Effective in Complement-Mediated Killing of Mycoplasma bovis
Source: PubMed Central journal article supplement (PMC6867846; doi:10.1128/iai.00740-19), 2019-11-18
Supplement: IAI.00740-19-s0001.pdf [file IAI.00740-19-s0001.pdf]

## *Supplementary Material*

**Table S1. Primers for PCR analysis**

| Number                                     | Primer sequence                                                                     | Position  |
|--------------------------------------------|-------------------------------------------------------------------------------------|-----------|
| Pyruvate dehydrogenase E2 component(PDHE2) |                                                                                     |           |
| E2-F                                       | <u>GGATCC</u> ATGTTTAAAATGCAATTACAGACG                                              | 1→25      |
| E2-R                                       | CTCGAGTTAGTTTGTTCATGTGAAAATTT                                                       | 212←237   |
| Purine-nucleoside phosphorylase(PNP)       |                                                                                     |           |
| PNP-F                                      | <u>GGATCC</u> ATGACACCACATAAATGCACC                                                 | 1→23      |
| PNP-R                                      | CTCGAGTTATGCTAACTCTAAAGCTATTTTC                                                     | 677←702   |
| glycerol ABC transporter(UgpB)             |                                                                                     |           |
| ugpB-1F                                    | <u>GGATCC</u> ATGTTGAAAAAATTTTTATTAAAGCTG                                           | 1→28      |
| ugpB-1R                                    | GCTTTTAAAGCATACCAAATTGATTGTTC                                                       | 679←707   |
| ugpB-2F                                    | GAACAATCAATTTGGTATGCTTTAAAAGC                                                       | 679→707   |
| ugpB-2R                                    | GAATTATTGTAGTCTTCCATAATTCCTGG                                                       | 999←1028  |
| ugpB-3F                                    | CCAAGAATTAT <b>TGG</b> AAGACTACAATAATTC                                             | 999→1028  |
| ugpB-3R                                    | AGATTTGCCATGAACCCCATTCCTTTG                                                         | 1115←1141 |
| ugpB-4F                                    | CAAAGAAT <b>TGGGG</b> TTCAT <b>TGG</b> CAAATCT                                      | 1115→1141 |
| ugpB-4R                                    | TGTACCAGTTATCTTCTTCTTCGCCAGAAACCTTGTT<br>TTGCCTGTGTATATCCATTTA                      | 1416←1474 |
| ugpB-5F                                    | TAAAT <b>TGG</b> ATATACACAGGCAAAAACAAGGTTTCTG<br>GCCAAGAAGAAGATAACT <b>TGG</b> TACA | 1416→1474 |
| ugpB-5R                                    | CTCGAGTTATTGTTTTTTAGTTTGTTCAAATG                                                    | 1853←1857 |
| membrane lipoprotein P81                   |                                                                                     |           |
| P81-1F                                     | <u>GGATCC</u> ATGAGTAAGAAAAATAAATTAATGATTG                                          | 1→28      |
| P81-1R                                     | AATGAAGCCATAGTATTCATTGTGGCT                                                         | 155←182   |
| P81-2F                                     | AGCCACAAT <b>TGGA</b> ATACTATGGCTTCATT                                              | 155→182   |
| P81-2R                                     | TTTCAAATTCACCCATAATTTTTGTACT                                                        | 675←703   |
| P81-3F                                     | AGTACAAAATTAT <b>TGGGG</b> TGAATTTGAAA                                              | 675→703   |
| P81-3R                                     | TCTTAAGAATAATAGCCATTGTTTATTATC                                                      | 1441←1470 |
| P81-4F                                     | GATAATAACAAT <b>TGG</b> CTATTATTCTTAAGA                                             | 1441→1470 |
| P81-4R                                     | TCTTTTCATTAGATTTATTCCATTTACCAG                                                      | 1664←1693 |
| P81-5F                                     | CTGGTAAAT <b>TGGA</b> ATAAATCTAATGAAAAGA                                            | 1664→1693 |
| P81-5R                                     | CTCGAG TTATTTAAGAATTTGACTGCTTGATG                                                   | 2162←2187 |

Underline indicates introduced restriction enzyme sites. Bold indicates TGA-to-TGG changes of the codon for permitting tryptophan expression in *E. coli*.

**Table S2. Association between color change and mycoplasma growth time.**

Fresh normal RS severed as a source of complement, and samples of *M. bovis* were grown in complete PPLO broth medium containing one of various rabbit antiserum. The color of the medium, which changes with *M. bovis* growth, was divided into categories corresponding to four growth stages.

|     | NC | PC  | NS  |     | anti- <i>M.bovis</i> |     | anti-PDHE2 |     | anti-PNP |     | anti-P81 |     | anti-UgpB |     |
|-----|----|-----|-----|-----|----------------------|-----|------------|-----|----------|-----|----------|-----|-----------|-----|
|     |    |     | RS  | HI  | RS                   | HI  | RS         | HI  | RS       | HI  | RS       | HI  | RS        | HI  |
| 0h  | -  | -   | -   | -   | -                    | -   | -          | -   | -        | -   | -        | -   | -         | -   |
| 12h | -  | +   | -   | +   | -                    | +   | -          | +   | -        | +   | -        | +   | -         | +   |
| 24h | -  | ++  | +   | ++  | -                    | ++  | +          | ++  | +        | ++  | -        | ++  | -         | ++  |
| 36h | -  | +++ | ++  | +++ | -                    | +++ | ++         | +++ | ++       | +++ | -        | +++ | -         | +++ |
| 48h | -  | +++ | +++ | +++ | -                    | +++ | +++        | +++ | +++      | +++ | -        | +++ | -         | +++ |

NC:negative control,2mL PPLO broth; PC: positive control, 2mL PPLO broth containing  $5 \times 10^4$  CFU/mL *M.bovis*. RS: with normal rabbit serum as the complement source; HI: with heat-inactivated normal rabbit serum as control. Grade of color: -, red; +, yellowish red; ++, orange; +++, yellow.

## Figure Captions

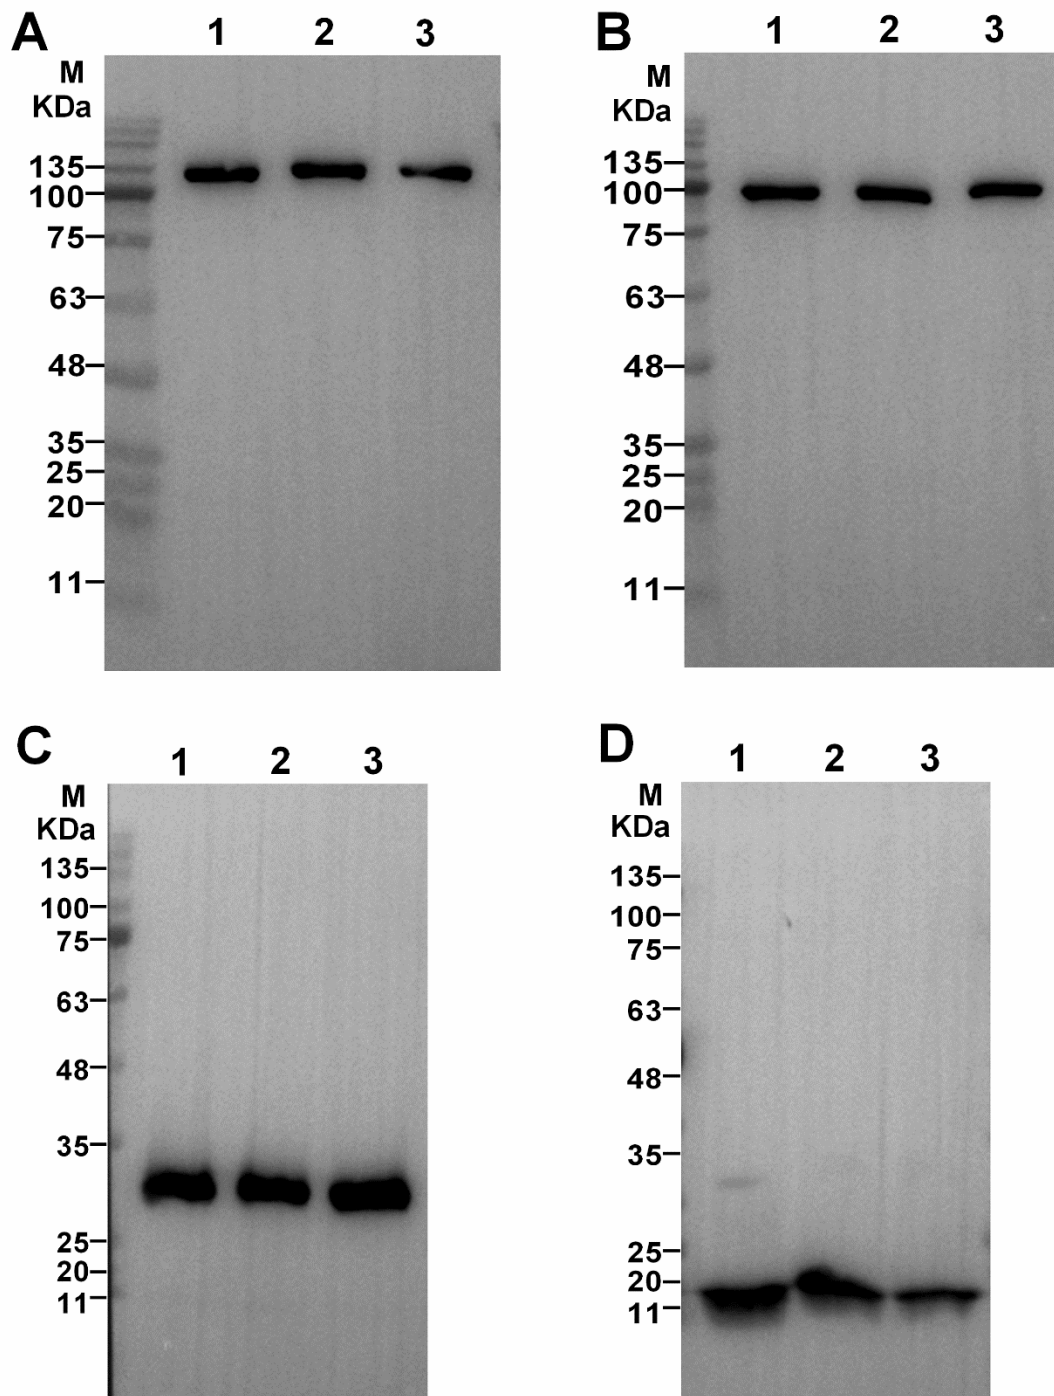

Fig.S1. Western blotting analysis. Western blotting was conducted with 25  $\mu$ g of whole cell proteins from *M. bovis* PG45 (Lanes 1), PD (Lanes 2), HB (Lanes 3), using rabbit anti-P81 pAb (A), rabbit anti-UgpB pAb (B), rabbit anti-PNP pAb (C), rabbit anti-PDHE2 pAb (D) as the primary antibody, respectively.
